# Supplementary material for: Other (Non-CNS/Testicular) Extramedullary Localizations of Childhood Relapsed Acute Lymphoblastic Leukemia and Lymphoblastic Lymphoma—A Report from the ALL-REZ Study Group
Source: MDPI journal article supplement (doi:10.3390/jcm10225292), 2021-11-14
Supplement: s1 [file s1]

## Supplementary

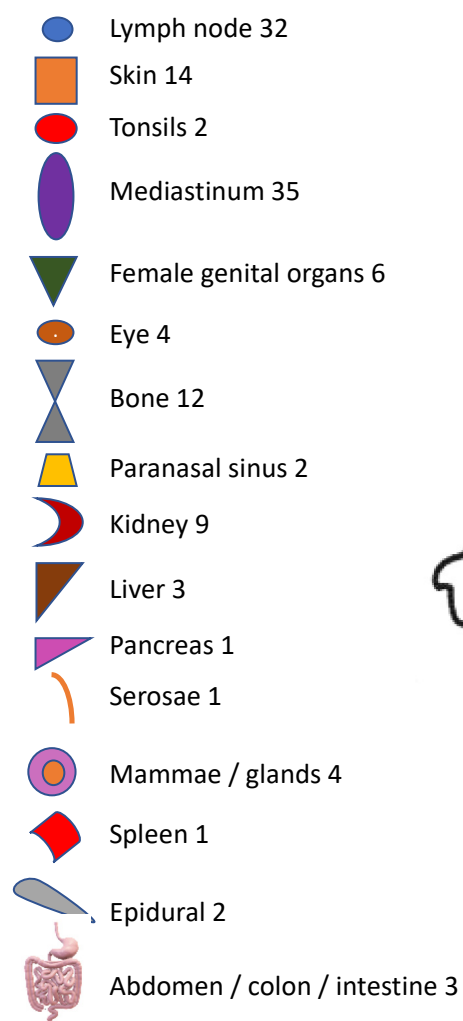

**Figure S1:** Distribution of other extramedullary ALL relapses.



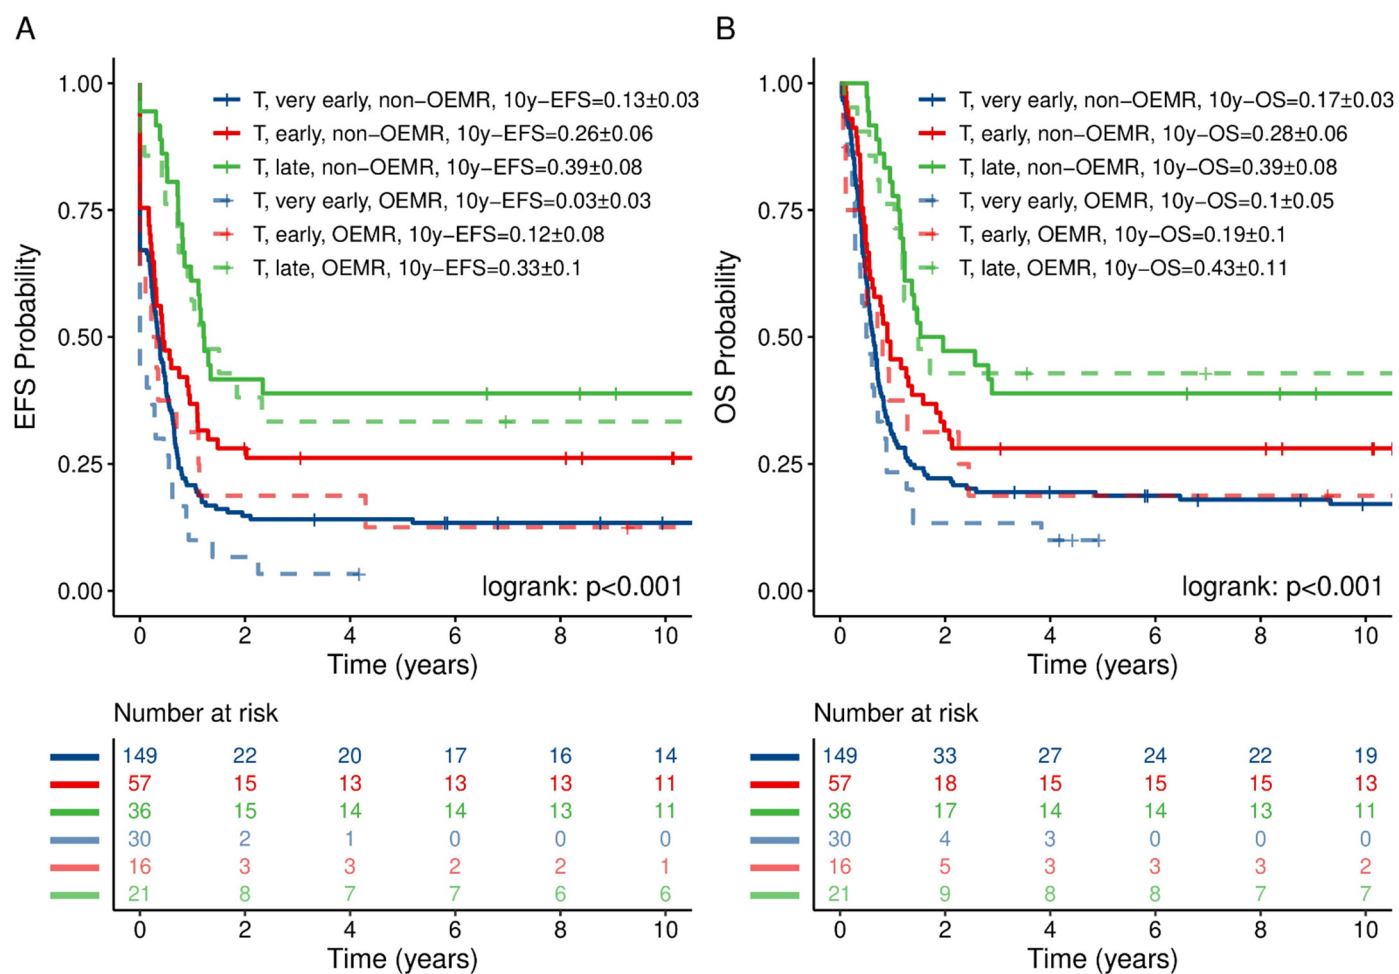

**Figure S2. T-ALL relapses.** pEFS (A) and pOS (B) of T-ALL OEMR and T-ALL non-OEMR depending on time to relapse.



1  
2  
3  
  
4  
5  
6  
7  
8  
9

Suppl. Table S1 genetic characteristics.

|                     | OEM   |       |      |       |     |       |      |       | OEMgroup           |       |             |       |             |       |      |       |       |       |
|---------------------|-------|-------|------|-------|-----|-------|------|-------|--------------------|-------|-------------|-------|-------------|-------|------|-------|-------|-------|
|                     | Total |       | no   |       | yes |       | .    |       | Lymphat.<br>organs |       | Skin/glands |       | Mediastinum |       | Bone |       | Other |       |
|                     | N     | %     | N    | %     | N   | %     | N    | %     | N                  | %     | N           | %     | N           | %     | N    | %     | N     | %     |
| <b>Total</b>        | 2323  | 100.0 | 2191 | 100.0 | 132 | 100.0 | 2191 | 100.0 | 32                 | 100.0 | 21          | 100.0 | 35          | 100.0 | 12   | 100.0 | 32    | 100.0 |
| <b>genexp</b>       |       |       |      |       |     |       |      |       |                    |       |             |       |             |       |      |       |       |       |
| <b>negative</b>     | 651   | 28.0  | 610  | 27.8  | 41  | 31.1  | 610  | 27.8  | 12                 | 37.5  | 9           | 42.9  | 8           | 22.9  | 1    | 8.3   | 11    | 34.4  |
| <b>BCR-ABL+</b>     | 20    | 0.9   | 19   | 0.9   | 1   | 0.8   | 19   | 0.9   | .                  | .     | 1           | 4.8   | .           | .     | .    | .     | .     | .     |
| <b>ETV6-RUNX1+</b>  | 132   | 5.7   | 131  | 6.0   | 1   | 0.8   | 131  | 6.0   | .                  | .     | .           | .     | .           | .     | .    | .     | 1     | 3.1   |
| <b>MLL-AF4+</b>     | 13    | 0.6   | 13   | 0.6   | .   | .     | 13   | 0.6   | .                  | .     | .           | .     | .           | .     | .    | .     | .     | .     |
| <b>not done</b>     | 711   | 30.6  | 663  | 30.3  | 48  | 36.4  | 663  | 30.3  | 11                 | 34.4  | 7           | 33.3  | 17          | 48.6  | 5    | 41.7  | 8     | 25.0  |
| <b>not reported</b> | 796   | 34.3  | 755  | 34.5  | 41  | 31.1  | 755  | 34.5  | 9                  | 28.1  | 4           | 19.0  | 10          | 28.6  | 6    | 50.0  | 12    | 37.5  |

Legend to Suppl table 1: Abbreviations: BCR-ABL, Abelson-Tyrosinkinase (Abl)-Breakpoint Cluster Region; MLL-AF4, myeloid/lymphoid or mixed-lineage leukemia- ALL1 fused gene on Chromosome 4; ETV6-RUNX1, Ets-leukemia virus- Runt-related transcription factor 1; OEM, other extramedullary.



Suppl Table S2    Radiation in non OEMR and OEMR patients

|                                     | OEMR  |       |                    |       | OEMgroup    |       |             |       |      |       |       |       |
|-------------------------------------|-------|-------|--------------------|-------|-------------|-------|-------------|-------|------|-------|-------|-------|
|                                     | total |       | Lymphat.<br>organs |       | Skin/glands |       | Mediastinum |       | Bone |       | Other |       |
|                                     | N     | %     | N                  | %     | N           | %     | N           | %     | N    | %     | N     | %     |
| Total                               | 132   | 100.0 | 32                 | 100.0 | 21          | 100.0 | 35          | 100.0 | 12   | 100.0 | 32    | 100.0 |
| radiation                           |       |       |                    |       |             |       |             |       |      |       |       |       |
| no                                  | 82    | 62.1  | 20                 | 62.5  | 14          | 66.7  | 17          | 48.6  | 10   | 83.3  | 21    | 65.6  |
| yes                                 | 46    | 34.9  | 12                 | 37.5  | 7           | 33.3  | 16          | 45.7  | 1    | 8.3   | 10    | 31.2  |
| unknown                             | 4     | 3.0   | .                  | .     | .           | .     | 2           | 5.7   | 1    | 8.3   | 1     | 3.1   |
| local radiation or TBI or TBI+boost |       |       |                    |       |             |       |             |       |      |       |       |       |
| local                               | 15    | 11.4  | .                  | .     | 2           | 9.5   | 9           | 25.7  | .    | .     | 4     | 12.5  |
| TBI                                 | 29    | 22.0  | 12                 | 37.5  | 5           | 23.8  | 6           | 17.1  | 1    | 8.3   | 5     | 15.6  |
| TBI + local boost                   | 2     | 1.5   | .                  | .     | .           | .     | 1           | 2.9   | .    | .     | 1     | 3.1   |
| unknown                             | 4     | 3.0   | .                  | .     | .           | .     | 2           | 5.7   | 1    | 8.3   | 1     | 3.1   |
